# Supplementary material for: Physical Mechanism of One-Photon Absorption, Two-Photon Absorption, and Electron Circular Dichroism of 1,3,5 Triazine Derivatives Based on Molecular Planarity
Source: MDPI journal article supplement (doi:10.3390/molecules28124700), 2023-06-11
Supplement: s1 [file s1]

# Physical Mechanism of One-Photon Absorption, Two-Photon Absorption, and Electron Circular Dichroism of 1,3,5 Triazine Derivatives Based on Molecular Planarity

Xiangtao Chen, Xiaoyan Shi, Fuming Yang, Xiqing Zhang, Rui Dai, Yan Jia, Ningte Yan, Sixuan Li, Zihan Wang and Zhongzhu Liang \*

Center for Advanced Optoelectronic Functional Materials Research and Key Laboratory of UV Light-Emitting Materials and Technology of Ministry of Education, College of Physics, Northeast Normal University, Changchun 130024, China; chenxt@nenu.edu.cn (X.C.); shixy@nenu.edu.cn (X.S.); yangfuming18@mails.uca.ac.cn (F.Y.); zhangxq0723@163.com (X.Z.); dair986@nenu.edu.cn (R.D.); jia071@nenu.edu.cn (Y.J.); yannt674@nenu.edu.cn (N.Y.); lisx554@nenu.edu.cn (S.L.); wangzh624@nenu.edu.cn (Z.W.)

\* Correspondence: liangzz@nenu.edu.cn

## 1. MO transition

**Table S1.** Major orbital transition contributions in OPA excited states.

| Excited energy, Wavelength, Oscillator strength, Spin multiplicity and percentage contribution of orbital transition (>5%) |
|----------------------------------------------------------------------------------------------------------------------------|
| o-Br-TRZ                                                                                                                   |
| Excited states: S <sub>1</sub> Excited energy :4.081eV Wavelength:281.26nm Oscillator strength :1.3162 Spin multiplicity=1 |
| MO transitions:H→L 27.2%, H-2→L 24.6%, H-1→L+1 20%, H→L+2 6.8%                                                             |
| Excited states: S <sub>2</sub> Excited energy :4.415eV Wavelength:280.80nm Oscillator strength :1.3588 Spin multiplicity=1 |
| MO transitions:H-2→L+1 27.2%, H-1→L 22.9%, H→L+1 19.8%, H-1→L+2 6.9%                                                       |
| m-Br-TRZ                                                                                                                   |
| Excited states: S <sub>1</sub> Excited energy :4.288eV Wavelength:289.12nm Oscillator strength :1.6480 Spin multiplicity=1 |
| MO transitions:H-1→L+1 24.8%, H→L 15.8%, H-2→L+1 13.5%, H-2→L 10.1%, H→L+2 8.3%, H-1→L 8.2%, H→L+1 6.5%                    |
| Excited states: S <sub>2</sub> Excited energy :4.293eV Wavelength:288.82nm Oscillator strength :1.7098 Spin multiplicity=1 |
| MO transitions:H-2→L 30.4%, H→L+1 20.8%, H-1→L 10.8%, H-2→L+1 10.7%, H-1→L+2 7.9%                                          |
| p-Br-TRZ                                                                                                                   |
| Excited states: S <sub>1</sub> Excited energy :4.215eV Wavelength:294.16nm Oscillator strength :1.8720 Spin multiplicity=1 |
| MO transitions:H-2→L 23.4%, H→L+1 15.2%, H-1→L 15%, H→L+2 10.4%, H-2→L+1 8.5%, H→L 8.1%, H-1→L+1 7.2%                      |
| Excited states: S <sub>2</sub> Excited energy :4.216eV Wavelength:294.07nm Oscillator strength :1.8768 Spin multiplicity=1 |
| MO transitions:H-2→L+1 25.4%, H-1→L+1 14.3%, H→L 14.1%, H-1→L+2 10.4%, H-2→L+2 9.4%, H-1→L 7.6%                            |

## 2. Interfragment charge transfer (IFCT) analysis

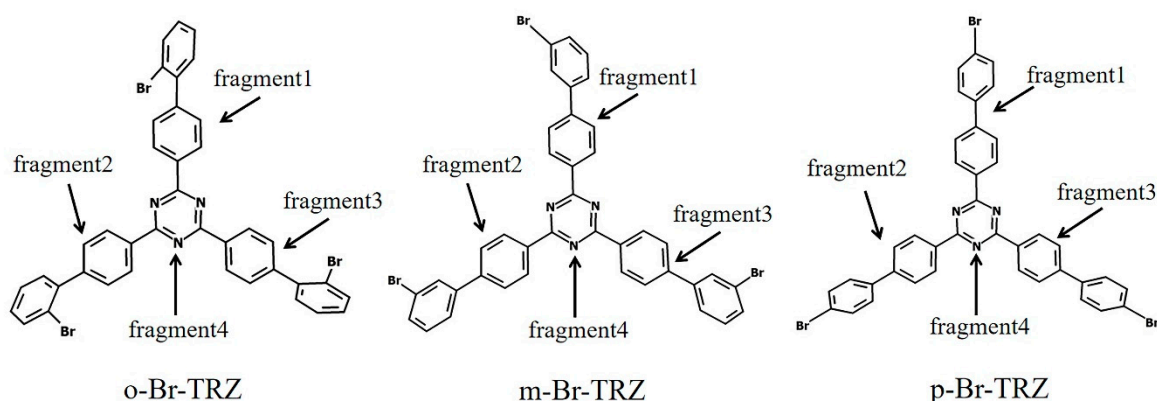

**Figure S1.** 1,3,5 Triazine derivative molecules with three branched fragments and triazine cores.

**Table S2.** Interfragment charge transfer and net CT of 1,3,5 triazine derivatives during electron excitation were calculated by IFCT method.

| Molecule | states | Variation of population number of fragment |         |         |        | Net charge transfer between segments |           |           |
|----------|--------|--------------------------------------------|---------|---------|--------|--------------------------------------|-----------|-----------|
|          |        | f1                                         | f2      | f3      | f4     | Net f1→f4                            | Net f2→f4 | Net f3→f4 |
| o-Br-TRZ | S1     | -0.1861                                    | 0.0011  | -0.0756 | 0.2605 | 0.1712                               | 0.0116    | 0.0777    |
|          | S2     | 0.0050                                     | -0.1801 | -0.0919 | 0.2670 | 0.0111                               | 0.1667    | 0.0891    |
| m-Br-TRZ | S1     | -0.1171                                    | 0.0152  | -0.1789 | 0.2808 | 0.1118                               | 0.0032    | 0.1658    |
|          | S2     | -0.0718                                    | -0.1978 | -0.0075 | 0.2772 | 0.0757                               | 0.1798    | 0.0217    |
| p-Br-TRZ | S1     | -0.0705                                    | -0.0083 | -0.1956 | 0.0386 | 0.0721                               | 0.0219    | 0.1803    |
|          | S2     | -0.1121                                    | -0.1743 | 0.0129  | 0.2734 | 0.1106                               | 0.1601    | 0.0027    |

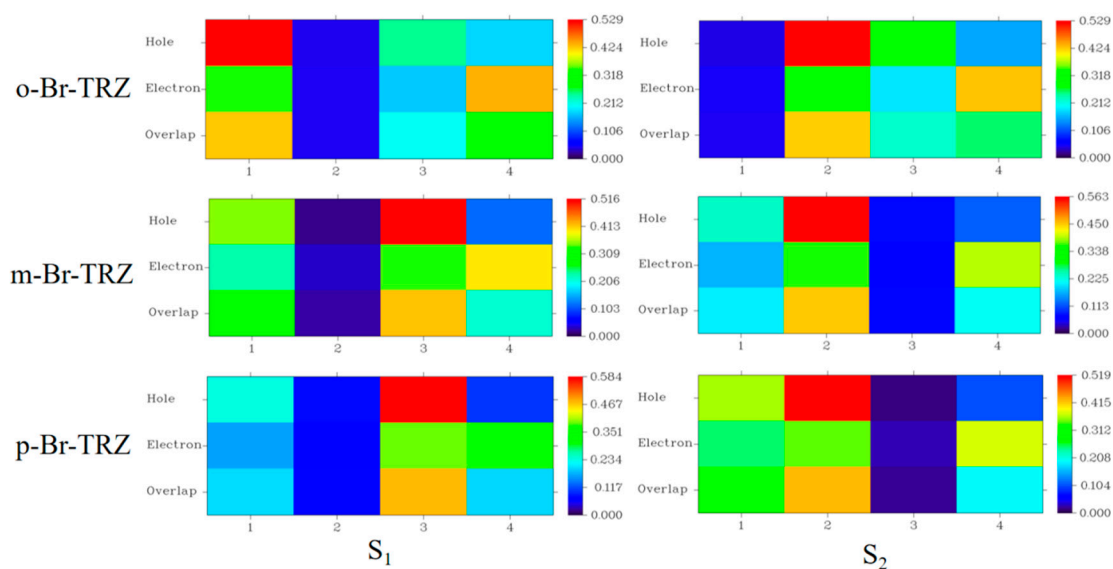

**Figure S2.** Heat map of the contribution of molecular fragment in 1,3,5 triazine derivatives to electron and hole contribution of electrons, holes, and electron hole overlap.

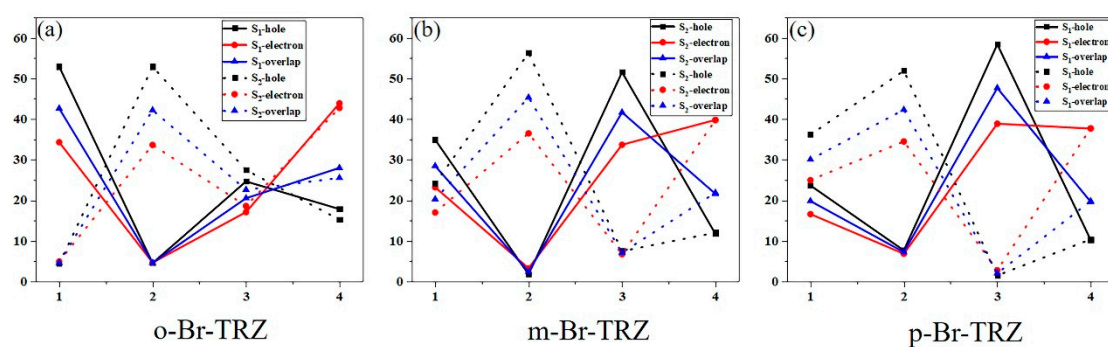

**Figure S3.** Scatter plot of the percentage contribution of different fragments of 1,3,5 triazine derivatives to electron excitation, hole and hole overlap.

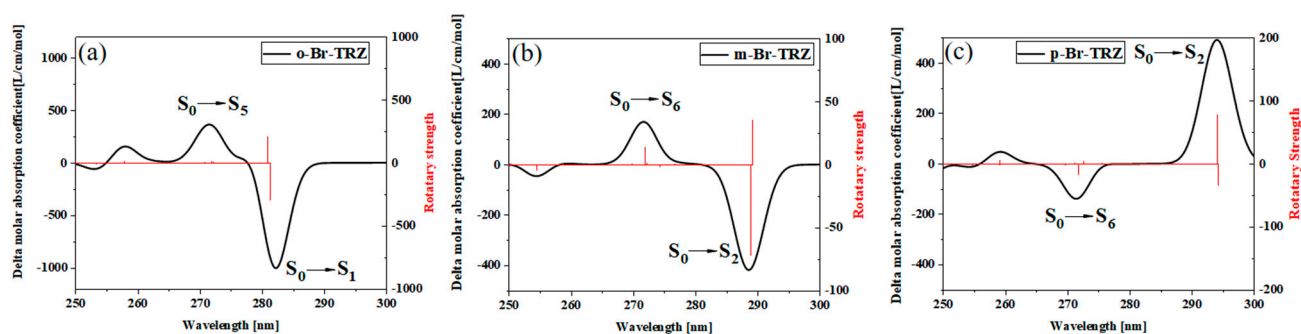

**Figure S4.** (Electron Circular Dichroism) ECD spectrum of o-Br-TRZ, m-Br-TR and p-Br-TRZ.
